# Supplementary material
Source: PubMed Central journal article supplement (PMC11104954)
Supplement: 18_2019_3249_MOESM1_ESM.pdf [file 18_2019_3249_MOESM1_ESM.pdf]

**Title: Non-peptidyl small molecule, adenosine, 5'-Se-methyl-5'-seleno-, 2',3'-diacetate, activates insulin receptor and attenuates hyperglycemia in type 2 diabetic *Lepr<sup>db/db</sup>* mice**

**Journal: Cellular and Molecular Life Sciences**

**Authors:** Zi-Jian Lan, Zhenmin Lei, Alexandros Yiannikouris, Thirupathi Reddy Yerramreddy, Xian Li, Hayley Kincaid, Katie Eastridge, Hannah Gadberry, Chloe Power, Rijin Xiao, Lei Lei, Olivia Seale, Karl Dawson and Ronan Power

**Correspondence to:** [zlan@alltech.com](mailto:zlan@alltech.com) and [rpower@alltech.com](mailto:rpower@alltech.com)

### Supplementary Material-1

#### Synthesis of NPC43 (Adenosine, 5'-*Se*-methyl-5'-seleno-, 2',3'-diacetate)

##### Scheme:

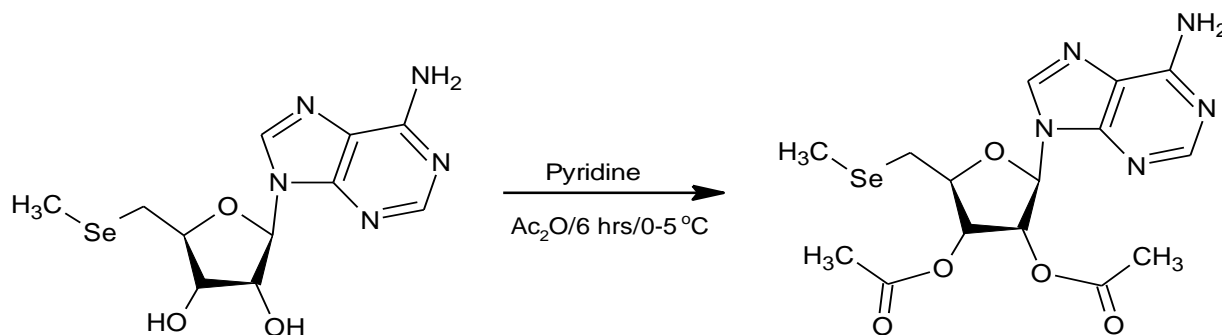

**Synthetic procedure:** 5'-*Se*-methyl-5'-seleno-Adenosine (1.0 gr, 0.0029 mole, 1.0 mole eq.) and anhydrous pyridine (10 ml) were placed in an oven dried, 50 ml three neck flask, equipped with a dropping funnel, inert gas inlet/outlet and a thermometer. The reaction set was placed in an ice/salt bath and agitation was initiated. When the temperature of the solution dropped to 0°C, acetic anhydride (10 ml, 0.105 mole, 36.47 mole eq.) was added drop-wise for 15 minutes and the temperature of the reaction mixture was maintained below 5°C during acetic anhydride addition. The reaction mixture was stirred for 6 hours at 0-5°C. The excess acetic anhydride was quenched by adding ice-cold water (100 ml), and then pH adjusted to 7 by adding 10% (wt/vol) NaHCO<sub>3</sub> aqueous solution. The aqueous mixture was extracted with ethyl acetate (2 x

100 ml). The combined ethyl acetate extracts were dried over anhydrous Na<sub>2</sub>SO<sub>4</sub> (1 gr) and filtered into a 250 ml round-bottomed flask. The filtrate was concentrated to dryness under reduced pressure at 35-40°C to yield a crude product as a pale yellow syrupy liquid. Pure product was then obtained as off-white crystals (1.12 gr, Yield: 90.3 %, Purity by HPLC and mass spectrometry: >99%) by passing the yellow liquid through a silica gel column with a mixture of ethyl acetate and hexanes (1:3 v/v).

### Synthesis of Adenosine, 5'-*Se*-methyl-5'-seleno-, cyclic 2',3'-carbonate (Compound #50):

#### Scheme:

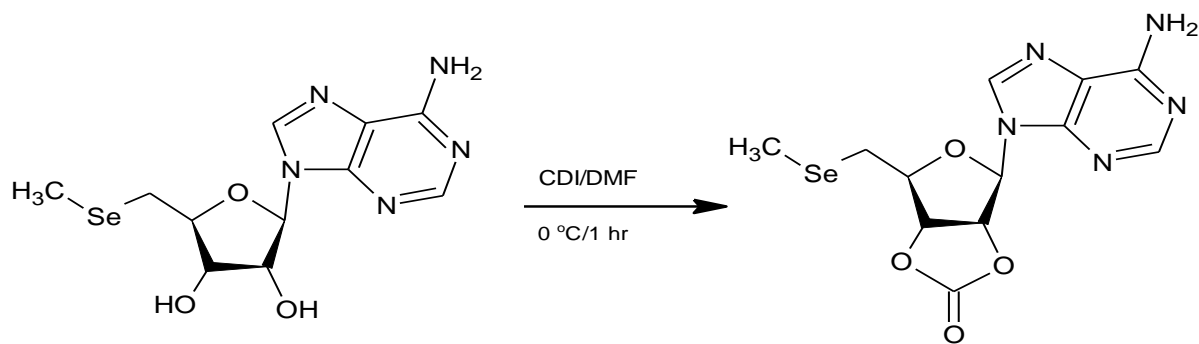

**Synthetic procedure:** 5'-*Se*-methyl-5'-seleno-Adenosine (1.0 gr, 0.0029 mole, 1.0 mole eq.) and anhydrous dimethylformamide (20 ml) were placed in an oven dried, 50 ml three neck flask, equipped with a dropping funnel, inert gas inlet/outlet and a thermometer. The reaction set was placed in an ice/salt bath and agitation was initiated. When the temperature of the solution dropped to 0°C, carbonyldiimidazole (CDI, 0.57 gr, 0.0035 mole, 1.21 mole eq.) was added at below 5°C. The reaction mixture was slowly warmed to the room temperature, and then stirred the reaction mixture for 4 hours at the same temperature under argon gas atmosphere. The solvent was removed under reduced pressure to yield a residue, which was then dissolved in a mixture of chloroform (5 ml) and ethanol (few drops) to get clear solution. The organic layer was washed with 1% aq. acetic acid solution (2 x 1 ml) and dried over anhydrous Na<sub>2</sub>SO<sub>4</sub> (1 gr), filtered into a 250 ml round-bottomed flask. The filtrate was concentrated to dryness under reduced pressure at 25-30°C to yield a crude product as a pale yellow syrupy liquid. The crude product was dissolved in a mixture of ethanol/water mixture (1:1 v/v), and then concentrated to dryness under reduced pressure at 45-50°C to give a residue to which hexane (25 ml) was added

and stirred for 10 minutes. The mixture was concentrated to dryness under reduced pressure at 30-35°C to yield the desired product as a off-white crystals (1.02 gr, Yield: 95.3 %, Purity by HPLC and mass spectrometry: >99%).

**Synthesis of a regio-isomeric mixture of Adenosine, 5'-*Se*-methyl-5'-seleno-, 2'-(4-morpholinocarbamate) and Adenosine, 5'-*Se*-methyl-5'-seleno-, 3'-(4-morpholinocarbamate) (Compound #53):**

**Scheme:**

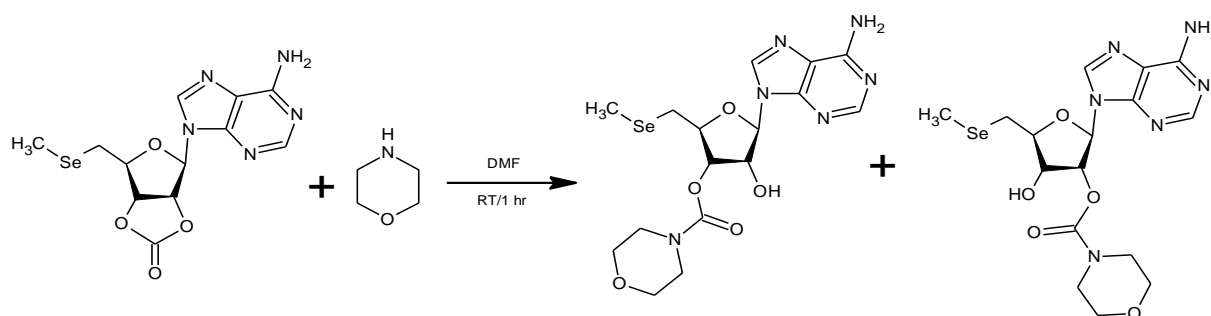

**Synthetic procedure:** Adenosine, 5'-*Se*-methyl-5'-seleno-, cyclic 2',3'-carbonate (1.0 gr, 0.0027 mole, 1.0 mole eq.) and anhydrous dimethylformamide (10 ml) were placed in an oven dried, 50 ml three neck flask, equipped with a dropping funnel, inert gas inlet/outlet and a thermometer. Morpholine (0.26 gr, 0.0029 mole, 1.1 mole eq.) was added at 20-25°C. The reaction mixture was stirred for 1 hour at room temperature, and then concentrated to dryness under reduced pressure at 45-50°C to yield a residue. Hexane (25 ml) was added and stirred for 10 minutes to precipitate the desired regio-isomeric mixture product as a off-white solid (1.12 gr, Yield: 91 %, Combined purity of both isomers by HPLC and mass spectrometry: >99%).

**Synthesis of Adenosine, 5'-*S*-methyl-5'-thio-, 2',3'-diacetate (Compound #68):**

**Scheme:**

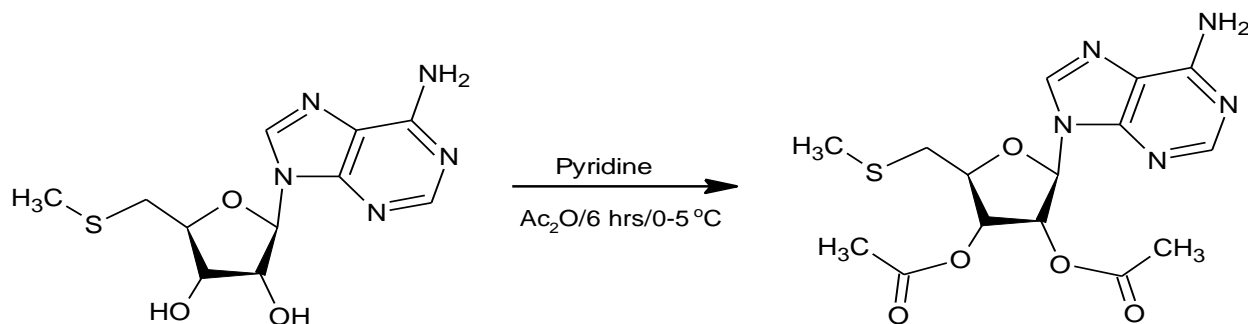

**Synthetic procedure:** 5'-S-methyl-5'-thio- Adenosine (1.0 gr, 0.0033 mole, 1.0 mole eq.) and anhydrous pyridine (10 ml) were placed in an oven dried, 50 ml three neck flask, equipped with a dropping funnel, inert gas inlet/outlet and a thermometer. The reaction set was placed in an ice/salt bath and agitation was initiated. When the temperature of the solution dropped to 0°C, acetic anhydride (10 ml, 0.105 mole, 31.8 mole eq.) was added drop-wise for 15 minutes and the temperature of the reaction mixture was maintained below 5°C during acetic anhydride addition. The reaction mixture was stirred for 6 hours at 5-10°C. The excess acetic anhydride was quenched by adding ice-cold water (100 ml), and then pH adjusted to 7 by adding 10 wt% NaHCO<sub>3</sub> aqueous solution. The aqueous mixture was extracted with ethyl acetate (2 x 100 ml). The combined ethyl acetate extracts were dried over anhydrous Na<sub>2</sub>SO<sub>4</sub> (1gr) and filtered into a 250 ml round-bottomed flask. The filtrate was concentrated to dryness under reduced pressure at 35-40°C to give the crude product as a pale yellow syrupy liquid. Pure product was then obtained as off-white crystals (1.08 gr, Yield: 87 %, Purity by HPLC and mass spectrometry: >99%) by passing the yellow liquid through a silica gel column with a mixture of ethyl acetate and hexane (1:3 v/v).

### Synthesis of Adenosine, 5'-*Se*-methyl-5'-seleno-, 2',3'-dipropionate (Compound #69):

#### Scheme:

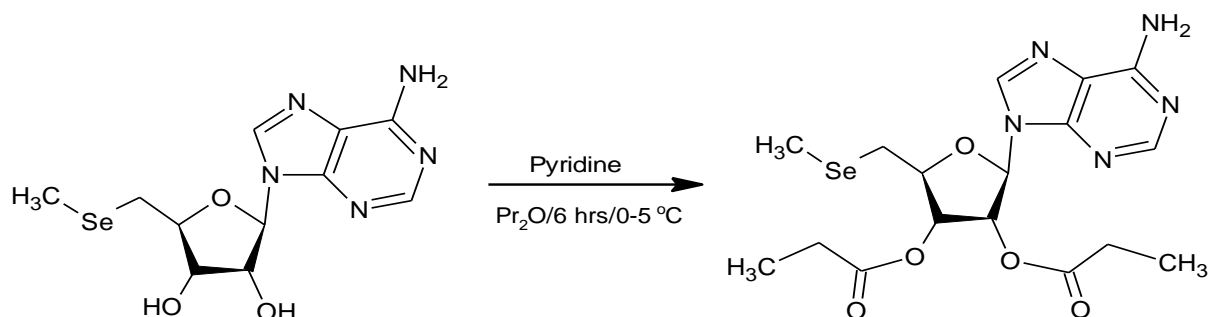

**Synthetic procedure:** 5'-*Se*-methyl-5'-seleno-Adenosine (1.0 gr, 0.0029 mole, 1.0 mole eq.) and anhydrous pyridine (10 ml) were placed in an oven dried, 50 ml three neck flask, equipped with a dropping funnel, inert gas inlet/outlet and a thermometer. The reaction set was placed in an ice/salt bath and agitation was initiated. When the temperature of the solution dropped to 0°C, propionic anhydride (10 ml, 0.078 mole, 27.0 mole eq.) was added drop-wise for 15 minutes and the temperature of the reaction mixture was maintained below 5°C during propionic anhydride addition. The reaction mixture was stirred for 6 hours at 0-5°C. The excess propionic anhydride was quenched by adding ice-cold water (100 ml), and then pH adjusted to 7 by adding 10 wt% NaHCO<sub>3</sub> aqueous solution. The aqueous mixture was extracted with ethyl acetate (2 x 100 ml). The combined ethyl acetate extracts were dried over anhydrous Na<sub>2</sub>SO<sub>4</sub> (1 gr), filtered into a 250 ml round-bottomed flask. The filtrate was concentrated to dryness under reduced pressure at 35-40°C to give the crude product as a pale yellow syrupy liquid. The pure product was obtained as off-white crystals (1.18 gr, Yield: 89.3 %, Purity by HPLC and mass spectrometry: >99%) by passing the yellow liquid through a silica gel column with a mixture of ethyl acetate and hexanes (1:3 v/v).

### Synthesis of Adenosine, 5'-*Se*-methyl-5'-seleno-, 2',3'-dibutanoate (Compound #70):

**Scheme:**

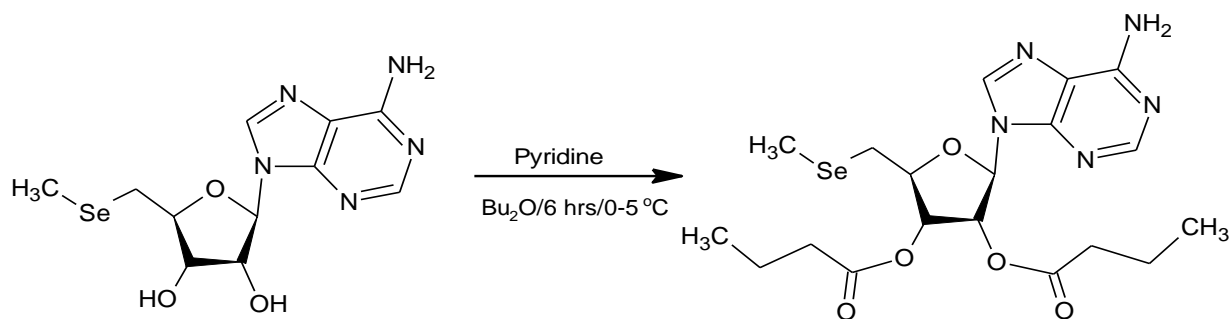

**Synthetic procedure:** 5'-Se-methyl-5'-seleno-Adenosine (1.0 gr, 0.0029 mole, 1.0 mole eq.) and anhydrous pyridine (10 ml) were placed in an oven dried, 50 ml three neck flask, equipped with a dropping funnel, inert gas inlet/outlet and a thermometer. The reaction set was placed in an ice/salt bath and agitation was initiated. When the temperature of the solution dropped to 0°C, butyric anhydride (10 ml, 0.078 mole, 27.0 mole eq.) was added drop-wise for 15 minutes and the temperature of the reaction mixture was maintained below 5°C during butyric anhydride addition. The reaction mixture was stirred for 6 hours at 0-5°C. The excess butyric anhydride was quenched by adding ice-cold water (100 ml), and then pH adjusted to 7 by adding 10 wt % NaHCO<sub>3</sub> aqueous solution. The aqueous mixture was extracted with ethyl acetate (2 x 100 ml). The combined ethyl acetate extracts were dried over anhydrous Na<sub>2</sub>SO<sub>4</sub> (1 gr), filtered into a 250 ml round-bottomed flask. The filtrate was concentrated to dryness under reduced pressure at 35-40°C to give the crude product as a pale yellow syrupy liquid. The pure product was obtained as off-white crystals (1.20 gr, Yield: 85.7 %, Purity by HPLC and mass spectrometry: >99%) by passing the yellow liquid through a silica gel column with a mixture of ethyl acetate and hexanes (1:3 v/v).
