# Supplementary material
Source: PubMed Central journal article supplement (PMC11104954)
Supplement: 18_2019_3249_MOESM2_ESM.pdf [file 18_2019_3249_MOESM2_ESM.pdf]

**Title:** Non-peptidyl small molecule, adenosine, 5'-Se-methyl-5'-seleno-, 2',3'-diacetate, activates insulin receptor and attenuates hyperglycemia in type 2 diabetic *Lepr<sup>db/db</sup>* mice

**Journal:** Cellular and Molecular Life Sciences

**Authors:** Zi-Jian Lan, Zhenmin Lei, Alexandros Yiannikouris, Thirupathi Reddy Yerramreddy, Xian Li, Hayley Kincaid, Katie Eastridge, Hannah Gadberry, Chloe Power, Rijin Xiao, Lei Lei, Olivia Seale, Karl Dawson and Ronan Power

**Correspondence to:** [zlan@alltech.com](mailto:zlan@alltech.com) and [rpower@alltech.com](mailto:rpower@alltech.com)

### Supplementary Material-2

The list of Sigma's compounds screened in HepG2 cells.

| Abbreviated name | Compound name                                            | Compound structure                                                                   | Molecular weight | Vendor                     |
|------------------|----------------------------------------------------------|--------------------------------------------------------------------------------------|------------------|----------------------------|
| #57              | Adenosine                                                | 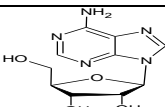    | 267.24           | Sigma<br>Cat#A4036         |
| #59              | 2',5'-Dideoxy-adenosine                                  |    | 235.24           | Sigma<br>Cat#D7408         |
| #60              | 5'-Deoxyadenosine                                        |   | 251.24           | Sigma<br>Cat#1771          |
| #61              | SQ 22,536                                                |   | 205.21           | Sigma<br>Cat#S153          |
| #62              | Adenine                                                  |   | 135.12           | Sigma<br>Cat#2786          |
| #63              | $\beta$ -Nicotinamide adenine dinucleotide hydrate (NAD) |  | 664.43           | Sigma<br>Cat#NAD<br>100-RO |
| #64              | S-(5'-Adenosyl)-L-methionine iodide (SAM)                |  | 526.35           | Sigma<br>Cat#A4377         |
