# Supplementary material
Source: PubMed Central journal article supplement (PMC11104954)
Supplement: 18_2019_3249_MOESM4_ESM.pdf [file 18_2019_3249_MOESM4_ESM.pdf]

**Title:** Non-peptidyl small molecule, adenosine, 5'-Se-methyl-5'-seleno-, 2',3'-diacetate, activates insulin receptor and attenuates hyperglycemia in type 2 diabetic *Lepr<sup>db/db</sup>* mice

**Journal:** Cellular and Molecular Life Sciences

**Authors:** Zi-Jian Lan, Zhenmin Lei, Alexandros Yiannikouris, Thirupathi Reddy Yerramreddy, Xian Li, Hayley Kincaid, Katie Eastridge, Hannah Gadberry, Chloe Power, Rijin Xiao, Lei Lei, Olivia Seale, Karl Dawson and Ronan Power

**Correspondence to:** [zlan@alltech.com](mailto:zlan@alltech.com) and [rpower@alltech.com](mailto:rpower@alltech.com)

#### Supplementary Material-4

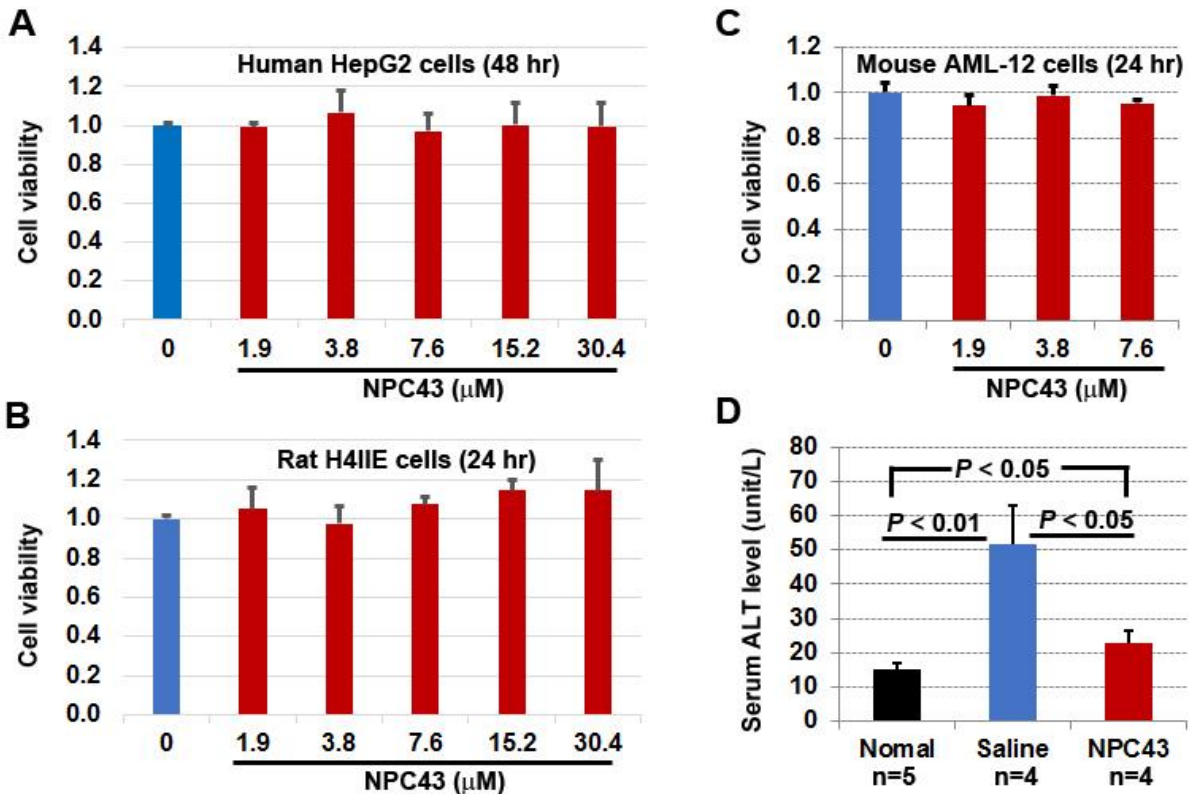

**Effects of NPC43 on (A-C) cultured liver cell viability and (D) serum ALT levels in *Lepr<sup>db/db</sup>* mice.** (A-C) No toxic effects of NPC43 on cell viability in cultured human, rat and mouse liver cells. Equal numbers of (A) HepG2, (B) H4IIE cells or (C) AML-12 cells were seeded on 96-well

plates, cultured overnight, treated with NPC43 solvent (0.24% DMSO, referred to as zero control) or NPC43 (1.9-30.4  $\mu\text{M}$ ) in serum-free media at 37°C for 24 hr (H4IIE and AML-12 cells) or 48 hr (HepG2 cell only), and then subjected to cell viability analysis. Data are presented as mean  $\pm$  SD of four replicates per group and *P* value was higher than 0.05 (all NPC43-treated groups vs. the zero control group, *Student's t-test*). **(D)** ALT levels in the sera of *Lepr<sup>db/db</sup>* mice after chronic treatment with NPC43. *Lepr<sup>db/db</sup>* mice were intraperitoneally injected with 0.2% (v/v) DMSO/physiological saline or NPC43 (0.136 mg/kg BW) daily for 52 days. Then, sera from these DMSO/saline- and NPC43-treated *Lepr<sup>db/db</sup>* mice, as well as age-matched (3-month-old) wild-type C57 mice (without treatments, referred to as normal group), were subjected to ALT analysis. Data are presented as Mean  $\pm$  SEM of indicated number of mice per group, and *Student's t-test* was performed to obtain the *P* value between indicated two groups.
