# Supplementary material
Source: PubMed Central journal article supplement (PMC11104954)
Supplement: 18_2019_3249_MOESM6_ESM.pdf [file 18_2019_3249_MOESM6_ESM.pdf]

**Title:** Non-peptidyl small molecule, adenosine, 5'-Se-methyl-5'-seleno-, 2',3'-diacetate, activates insulin receptor and attenuates hyperglycemia in type 2 diabetic *Lepr<sup>db/db</sup>* mice

**Journal:** Cellular and Molecular Life Sciences

**Authors:** Zi-Jian Lan, Zhenmin Lei, Alexandros Yiannikouris, Thirupathi Reddy Yerramreddy, Xian Li, Hayley Kincaid, Katie Eastridge, Hannah Gadberry, Chloe Power, Rijin Xiao, Lei Lei, Olivia Seale, Karl Dawson and Ronan Power

**Correspondence to:** [zlan@alltech.com](mailto:zlan@alltech.com) and [rpower@alltech.com](mailto:rpower@alltech.com)

### Supplementary Material-6

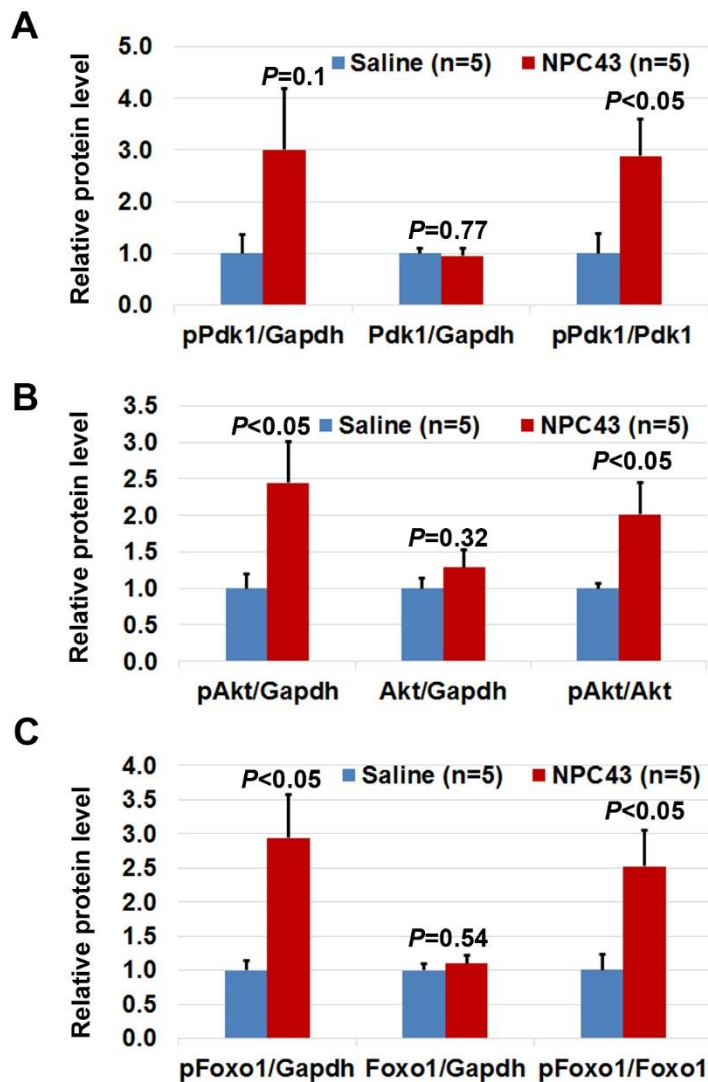

**Quantitative changes in protein expression of (A) pPdk1/Pdk1, (B) pAkt/Akt and (C) pFoxo1/Foxo1 in the liver of *Lepr<sup>db/db</sup>* mice after chronic treatment with NPC43, as determined by Western blot analysis shown in Fig. 4C.** Densities of protein bands shown in Western blots (Fig. 4C) were determined using NIH Image J software. Data are presented as mean  $\pm$  SEM of 5 mice per group. The *P* value between saline- and NPC43-treated groups was determined by performing *Student's t-test*.
