# Supplementary material
Source: PubMed Central journal article supplement (PMC11104954)
Supplement: 18_2019_3249_MOESM7_ESM.pdf [file 18_2019_3249_MOESM7_ESM.pdf]

**Title:** Non-peptidyl small molecule, adenosine, 5'-Se-methyl-5'-seleno-, 2',3'-diacetate, activates insulin receptor and attenuates hyperglycemia in type 2 diabetic *Lepr<sup>db/db</sup>* mice

**Journal:** Cellular and Molecular Life Sciences

**Authors:** Zi-Jian Lan, Zhenmin Lei, Alexandros Yiannikouris, Thirupathi Reddy Yerramreddy, Xian Li, Hayley Kincaid, Katie Eastridge, Hannah Gadberry, Chloe Power, Rijin Xiao, Lei Lei, Olivia Seale, Karl Dawson and Ronan Power

**Correspondence to:** [zlan@alltech.com](mailto:zlan@alltech.com) and [rpower@alltech.com](mailto:rpower@alltech.com)

**Supplementary Material-7:**

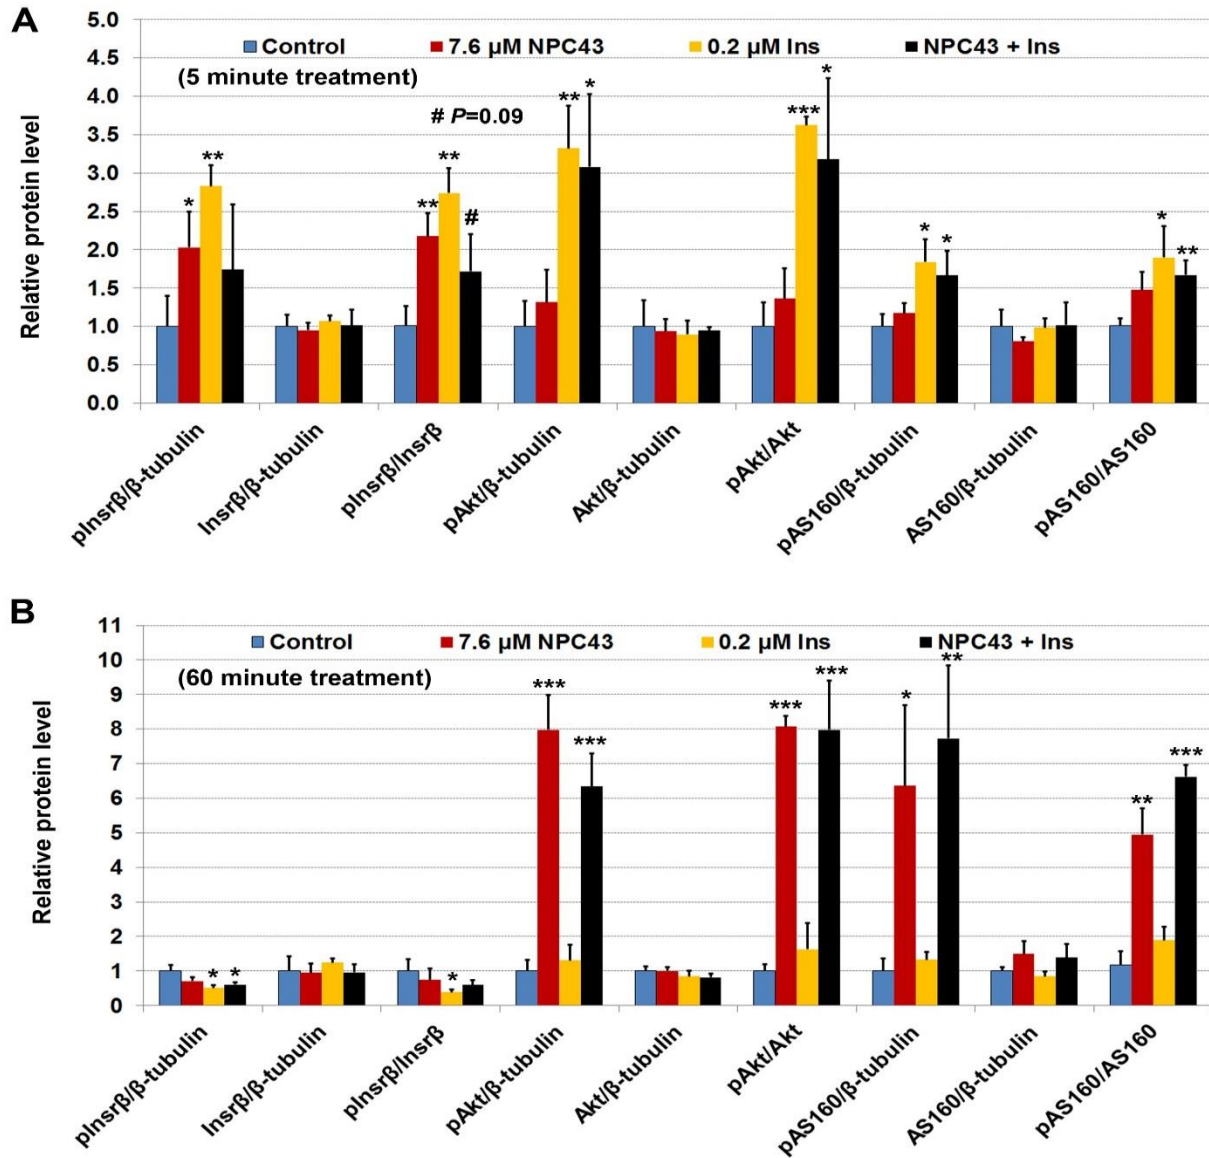

**Quantitative changes in protein expression of pInsr $\beta$  Y1146 and its downstream signaling molecules, Akt and AS160, in differentiated C2C12 (skeletal muscle) cells after treatment with NPC43 (7.6  $\mu$ M), insulin (Ins, 0.2  $\mu$ M) or both for (A) 5 and (B) 60 minutes, as determined by Western blot analysis shown in Fig. 6A.** Densities of protein bands in Western blots (Fig. 6A) were determined using NIH Image J software. Data are presented as mean  $\pm$  SD of triplicates per group. \* $P < 0.05$ , \*\* $P < 0.01$ , \*\*\* $P < 0.001$ , vs. its control group (without NPC43 treatment group, *Student's t-test*).
