# Supplementary material
Source: PubMed Central journal article supplement (PMC11104954)
Supplement: 18_2019_3249_MOESM9_ESM.pdf [file 18_2019_3249_MOESM9_ESM.pdf]

**Title:** Non-peptidyl small molecule, adenosine, 5'-Se-methyl-5'-seleno-, 2',3'-diacetate, activates insulin receptor and attenuates hyperglycemia in type 2 diabetic *Lepr<sup>db/db</sup>* mice

**Journal:** Cellular and Molecular Life Sciences

**Authors:** Zi-Jian Lan, Zhenmin Lei, Alexandros Yiannikouris, Thirupathi Reddy Yerramreddy, Xian Li, Hayley Kincaid, Katie Eastridge, Hannah Gadberry, Chloe Power, Rijin Xiao, Lei Lei, Olivia Seale, Karl Dawson and Ronan Power

**Correspondence to:** [zlan@alltech.com](mailto:zlan@alltech.com) and [rpower@alltech.com](mailto:rpower@alltech.com)

### Supplementary Material-9

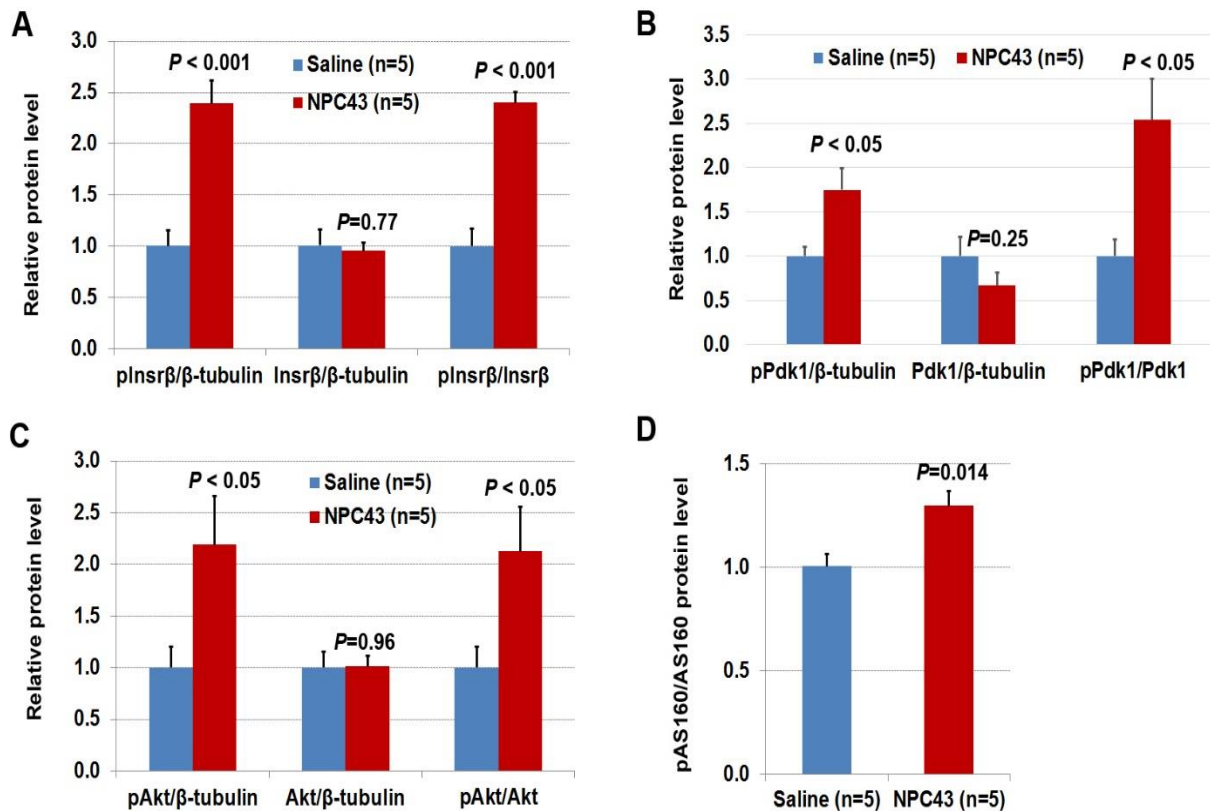

**Quantitative changes in protein expression of (A) pInsrβ Y1146/Insrβ, (B) pPdk1 S241/Pdk1, (C) pAkt T308/Akt, and (D) pAS160 S588/AS160 in the skeletal muscle of *Lepr<sup>db/db</sup>* mice after chronic i.p. treatment with NPC43, as determined by Western blot analysis and/or immunoprecipitation shown in Fig. 6B. Protein band densities in Western blots in Fig. 6B were determined using NIH Image J software, and data are presented as mean ± SEM of 5 mice per group. P value (the NPC43-treated group vs. the control saline group) was determined by performing *Student's t-test*.**
