# Supplementary material
Source: PubMed Central journal article supplement (PMC11104954)
Supplement: 18_2019_3249_MOESM10_ESM.pdf [file 18_2019_3249_MOESM10_ESM.pdf]

**Title:** Non-peptidyl small molecule, adenosine, 5'-Se-methyl-5'-seleno-, 2',3'-diacetate, activates insulin receptor and attenuates hyperglycemia in type 2 diabetic *Lepr<sup>db/db</sup>* mice

**Journal:** Cellular and Molecular Life Sciences

**Authors:** Zi-Jian Lan, Zhenmin Lei, Alexandros Yiannikouris, Thirupathi Reddy Yerramreddy, Xian Li, Hayley Kincaid, Katie Eastridge, Hannah Gadberry, Chloe Power, Rijin Xiao, Lei Lei, Olivia Seale, Karl Dawson and Ronan Power

**Correspondence to:** [zlan@alltech.com](mailto:zlan@alltech.com) and [rpower@alltech.com](mailto:rpower@alltech.com)

**Supplementary Material-10**

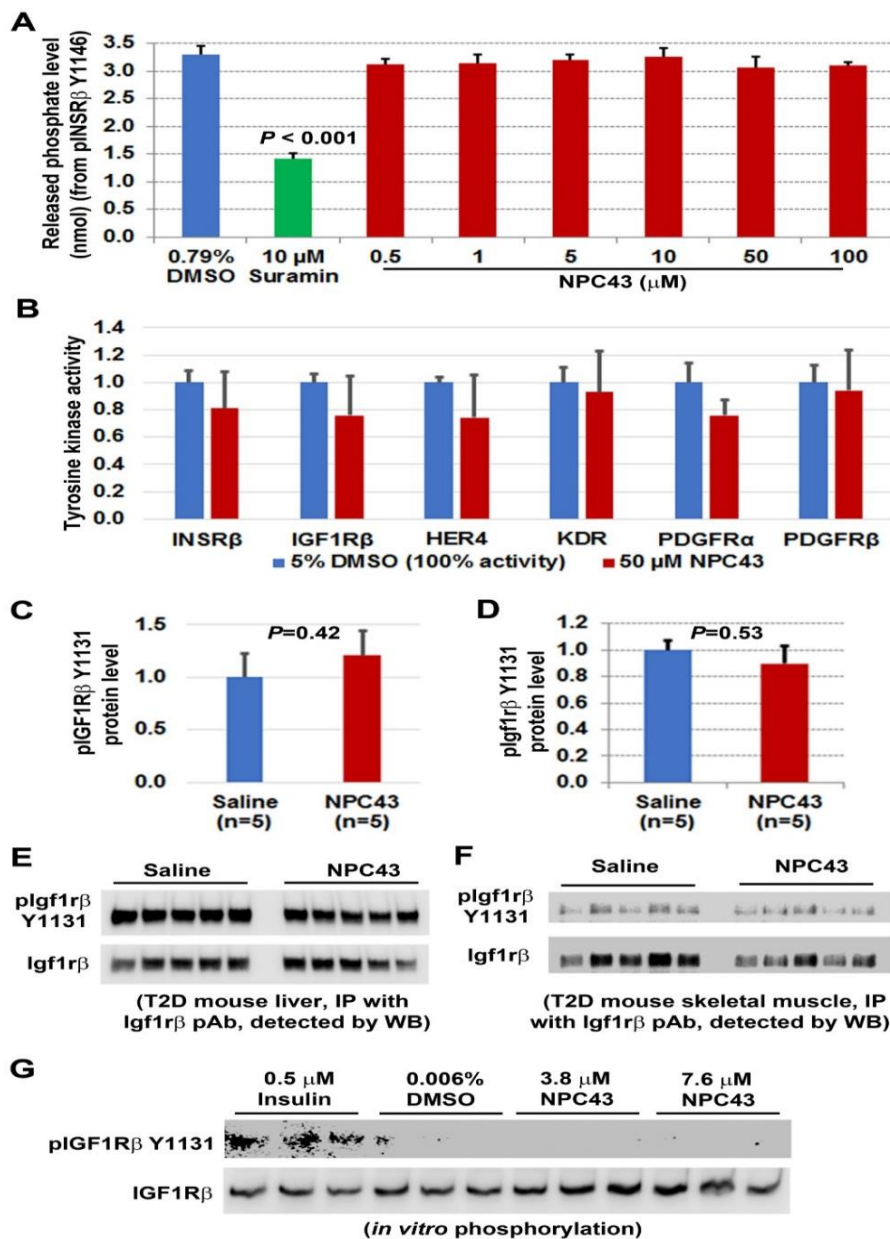

**Effects of NPC43 on (A-B) the activities of intracellular PTP1B and several major tyrosine kinases *in vitro*, (C-E) the activation of endogenous Igf1r in liver and skeletal muscle of *Lep<sup>db/db</sup>* mice, and (G) the activation of IGF1R protein in a cell-free *in vitro* phosphorylation system. (A)** No effects of NPC43 on the PTP1B activity *in vitro*. Recombinant PTP1B (2.5 ng) and its substrate (75  $\mu$ M, INSR $\beta$  amino acid residues 1142-1153, pY-1146) were incubated with 0.79% (v/v) DMSO (the NPC43 solvent), suramin (a positive inhibitor, 10  $\mu$ M) or 1-100  $\mu$ M NPC43 and subjected to *in vitro* PTP1B assays to determine the released phosphate levels. Mean  $\pm$  SD of triplicates per group. *P* values (vs 0.79%DMSO group) in all NPC43-treated groups was higher than 0.05 (*Student's t-test*). **(B)** No enhanced tyrosine kinase activity of INSR $\beta$ , IGF1R $\beta$ , HER4, KDR, PDGFR $\alpha$  or PDGFR $\beta$  *in vitro* after NPC43 treatment, as determined by *in vitro* receptor tyrosine kinase assays. The NPC43 solvent [5% (v/v) DMSO in PBS buffer) was included as a positive control (referred to 100% kinase activity). Data are presented as mean  $\pm$  SD of triplicates per group. *P* values in all NPC43-treated groups were higher than 0.05 (vs. the 5% DMSO group, *Student's t-test*). **(C-F)** No significant increase in protein levels of pIgf1r $\beta$  at Y1131 in the **(C, E)** liver and **(D, F)** gastrocnemius of *Lep<sup>db/db</sup>* mice after chronic i.p. treatment with NPC43, as determined by **(C-D)** ELISA and **(E-F)** co-immunoprecipitation analysis. Male *Lep<sup>db/db</sup>* mice at postnatal day 38 were i.p. injected daily with 0.2% (v/v) DMSO/physiological saline (referred to as the saline group) or NPC43 (0.136 mg/kg BW) for 52 days. Liver protein extracts (50  $\mu$ g protein) or skeletal muscle protein extracts (150  $\mu$ g protein) from five saline- or NPC43-treated mice were subjected to **(C-D)** ELISA analysis of pIgf1r $\beta$ Y1131. Data in **C-D** are presented as mean  $\pm$  SEM, and *P* values between saline control and NPC43-treated groups were determined by performing *Student's t-test*. In **(E-F)**, liver or skeletal muscle protein extracts (600  $\mu$ g) from five saline- or NPC43-treated mice were immunoprecipitated with a specific Igf1r antibody followed by Western blot analysis of pIgf1r $\beta$  at Y1131 and total Igf1r $\beta$  in these immunoprecipitated samples. **(G)** No activation of IGF1R protein by NPC43 in the cell-free *in vitro* phosphorylation system. Equal amounts of purified IGF1R protein (400 ng, triplicates per group) were incubated with 0.5  $\mu$ M insulin, 0.006% (v/v) DMSO or NPC43 (3.8 or 7.6  $\mu$ M) and subjected to *in vitro* phosphorylation analysis. Activated IGF1R (i.e. IGF1R $\beta$  Y1131) and total IGF1R $\beta$  protein in the *in vitro* phosphorylation reactions were detected by Western blot analysis. Experiments were repeated three times. Note the activation of IGF1R by insulin, but not by NPC43 at the tested doses.
