# Supplementary material
Source: PubMed Central journal article supplement (PMC11104954)
Supplement: 18_2019_3249_MOESM11_ESM.pdf [file 18_2019_3249_MOESM11_ESM.pdf]

**Title:** Non-peptidyl small molecule, adenosine, 5'-Se-methyl-5'-seleno-, 2',3'-diacetate, activates insulin receptor and attenuates hyperglycemia in type 2 diabetic *Lepr<sup>db/db</sup>* mice

**Journal:** Cellular and Molecular Life Sciences

**Authors:** Zi-Jian Lan, Zhenmin Lei, Alexandros Yiannikouris, Thirupathi Reddy Yerramreddy, Xian Li, Hayley Kincaid, Katie Eastridge, Hannah Gadberry, Chloe Power, Rijin Xiao, Lei Lei, Olivia Seale, Karl Dawson and Ronan Power

**Correspondence to:** [zlan@alltech.com](mailto:zlan@alltech.com) and [rpower@alltech.com](mailto:rpower@alltech.com)

### Supplementary Material-11

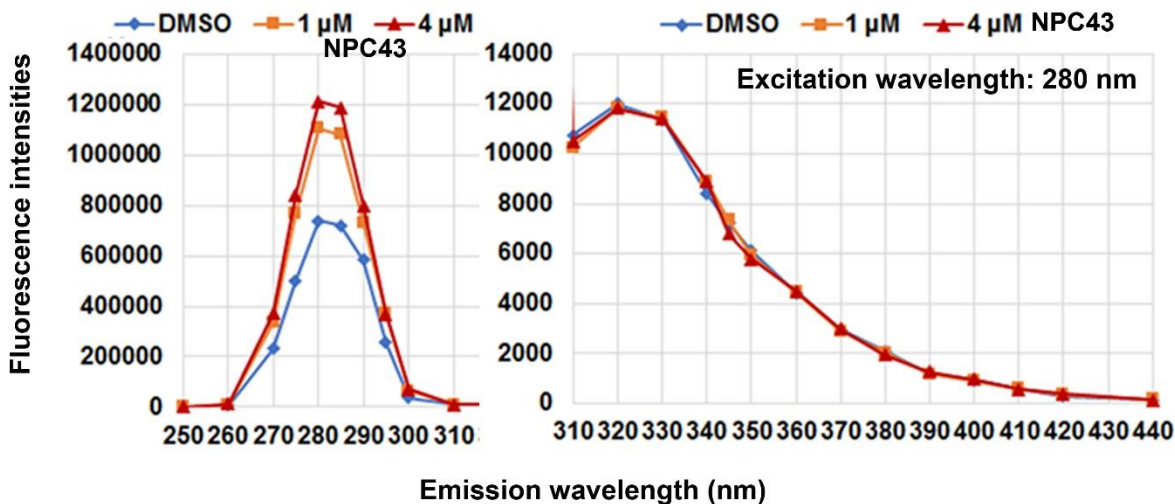

NPC43 alone had intrinsic fluorescence at Em 270-300 nm/Ex 280 nm (which overlaps the Phe/Tyr fluorescence of recombinant INSR $\alpha$  protein) but not at Em 310-440 nm/Ex 280 nm. The fluorescence spectra of DMSO (0.006%, v/v, the NPC43 solvent) and NPC43 (1  $\mu$ M or 4  $\mu$ M) in plain 1X PBS buffer at the emission wavelengths from 250 to 440 nm with an excitation wavelength of 280 nm were recorded by a fluorometer. Note the increased fluorescence in NPC43 solutions at Em 270-300 nm/Ex 280 nm but no change in fluorescence at Em 310-440 nm/Ex 280 nm (vs. the DMSO solution).
